# Supplementary material for: Aptamer‐Mediated Reversible Transactivation of Gene Expression by Light
Source: PubMed Central journal article supplement (PMC7756287; doi:10.1002/anie.202009240), 2020-10-02
Supplement: ANIE-59-22414-s001.pdf [file ANIE-59-22414-s001.pdf]

Supporting Information

**Aptamer-Mediated Reversible Transactivation of Gene Expression by Light**

*Christian Renzl, Ankana Kakoti, and Günter Mayer\**

anie\_202009240\_sm\_miscellaneous\_information.pdf

## SUPPORTING INFORMATION

## Experimental Section

**Sequences:** DNA sequences of the primers for amplification were ordered from Ella Biotech (Martinsried, Germany) and are provided together with the RNA sequences of the sgRNAs in the Supplementary Information.

**Cell culture:** For all experiments, HeLa cells (CLS, Eppenheim, Germany) were used. The cells were cultured in DMEM (Gibco Thermo Fisher Scientific, Waltham, USA) supplied with 10% FCS, 1% non-essential amino acids and 1 mM sodium pyruvate. Usually, the cells were cultivated in T-75 flasks and passaged 2-3 times weekly.

**Transfection:** For optogenetic gene activation experiments, 70.000 HeLa cells were seeded into 24-well plates one day before transfection. After 24h, the transfection reagents were prepared. For the first experiments with fixed nanograms of plasmid, 200 ng of reporter plasmid, 300 ng of dCas9 plasmid, 200 ng of effector plasmid and 100 ng of sgRNA plasmid were used (Figure S2d, Supporting Information). After the transfection optimization (Figure S2f, Supporting Information), fixed molar ratios were used. For each transfection a total amount of 200 fmol plasmids were added into a reaction tube and filled with OptiMEM (Gibco Thermo Fisher Scientific, Waltham, USA) to a final volume of 25  $\mu$ l per transfection reaction. In a second tube 25  $\mu$ l OptiMEM was mixed with 1,5  $\mu$ l Lipofectamine<sup>®</sup> 2000 Reagent (Gibco Thermo Fisher Scientific, Waltham, USA). Both tubes were vortexed shortly and incubated for 5 min at 20 °C. Subsequently, the plasmid mix was added to the Lipofectamine mix. The resulting composition was vortexed shortly and incubated for 30 min at 20 °C. In parallel, the medium of the seeded cells was removed and replaced by 500  $\mu$ l prewarmed OptiMEM. After the 30 min incubation time, the resulting 50  $\mu$ l total transfection mix was added to the cells dropwise. The transfection was incubated for 4 hours at 37 °C and 5% CO<sub>2</sub>. After 4 hours, the transfection mix was removed and replaced by 500  $\mu$ l of DMEM + 10 % FCS. For confocal microscopy experiments 50.000 HeLa cells were seeded in black 24-well plates with clear bottom ( $\mu$ -plate, ibidi, Martinsried, Germany). On the next day the cells were transfected using 500 ng of plasmid as previously described.

**Confocal microscopy experiments:** For the analysis of switching of PAL, HeLa cells were seeded and transfected with PHP (Supplementary Figure 2 c). On day after transfection, the cells were analyzed, using a Zeiss LSM 710 Axio Observer (Zeiss, Oberkochen, Germany) and a 40x magnification. The switching program used, first takes images in the mCherry channel (ex. 588 nm, em. 610 nm) and irradiates the cells with a laser at 405 nm for 1 min to induce the conformational change of PAL. It uses the emission filter of the eGFP channel (em. 510 nm) to select for the PAL dark fluorescence and subsequently takes images for mCherry and PAL dark fluorescence again. Pictures were taken for each channel separately and merged.

**Reporter constructions:** Cloning of pGL3-8xsgRNA-eBFP and pGL3-8xsgRNA-metLuc. The template for the final plasmid is the pGL3-Basic-8x-gRNA-eGFP. pGL3-Basic-8x-gRNA-eGFP was a gift from Charles Gersbach (Addgene plasmid # 60718). The backbone was amplified by PCR, excluding the eGFP sequence. The eBFP insert was PCR amplified from pU6-(BbsI)Cbh-Cas9-T2A-BFP. pU6-(BbsI)Cbh-Cas9-T2A-BFP was a gift from Ralf Kuehn (Addgene plasmid # 64323). The *Metridia* luciferase insert was PCR amplified from pMetLuc2-Reporter (Clontech Takara, Saint-Germain-en-Laye, France). For the plasmid amplification the Phusion Flash High-Fidelity PCR Master Mix (Thermo Fisher Scientific) was used. The primers for the insert were designed to have an overlap with the target backbone. For the cloning, In-Fusion<sup>®</sup> HD Cloning Kit (Clontech Takara, Saint-Germain-en-Laye, France) was used according to the manufacturers protocol.

**Cloning of PHP and HPP:** All fragments for the cloning of PHP were PCR amplified from the plasmids pmCherryPAL and MS2-p65-HSF1\_GFP. MS2-P65-HSF1\_GFP was a gift from Feng Zhang (Addgene plasmid # 61423). The full-length insert was cloned into the pEGFP-N1 (Clontech) backbone, which was amplified by inverse PCR using Phusion Flash High-Fidelity PCR Master Mix. The insert MPH from MS2-P65-HSF1\_GFP was cloned into the pEGFP-N1 backbone. For the cloning, Gibson Assembly<sup>®</sup> Master Mix (NEB, Ipswich) was used according to the manufacturers protocol. HPP was generated from PHP by PCR and AQUA cloning.

**dCas9 constructions:** As PCR template for the final pdCas9\_eGFP, the plasmid dCAS9-VP64\_GFP was used. dCAS9-VP64\_GFP was a gift from Feng Zhang (Addgene plasmid # 61422; <http://n2t.net/addgene:61422>; RRID: Addgene\_61422). The backbone was amplified by PCR, excluding the VP64 sequence. For the plasmid amplification, Phusion Flash High-Fidelity PCR Master Mix was used. The primers for the insert were designed to have an overlap with the target backbone. The amplicon was phosphorylated and ligated to gain pdCas9\_T2A\_eGFP.

**sgRNA constructions:** The sgRNAs containing PAL aptamers were designed using the sgRNA 2.0 scaffold as a template. The stem regions of the tetraloop and stem-loop 2 were preserved and artificial stem sequences were added. The sequences were tested for correct folding using mFold software. As host plasmid pENTR.hU6 was used. The plasmid backbone was amplified using Phusion Flash High-Fidelity PCR Master Mix. The sgRNA inserts were ordered from Ella Biotech (Martinsried, Germany) and cloned into the pENTR.hU6 backbone using AQUA cloning (Table S2, Supporting Information). New seed sequences were introduced by PCR, where the forward primer contains the new seed sequence as 5' extension.

**Optogenetic gene activation assays:** HeLa cells were seeded at 70.000 cells per well in 24-well plates and cultured for 24h at 37 °C and 5% CO<sub>2</sub>. HeLa cells were transfected using Lipofectamine 2000. For the experiments four plasmids were mixed in a specific ratio and a final amount of 200 fmol. The ratio used was 2:1:1:1 (dCas9:Effector:sgRNA:Reporter). For MS2 dependent activation MPH was used. For PAL dependent activation the plasmid PHP or HPP was used. For all experiments the pdCas9-T2A-eGFP plasmid was used for dCas9 expression. For the expression of the sgRNAs, pENTR plasmids that contains a hU6 promoter were used. The transfection was incubated for 4 hours at 37°C and 5% CO<sub>2</sub> in the presence of blue light of 465 nm or in the absence of light. After the replacement of medium the cells were incubated for 24 hours in the light or in the dark. For flow cytometry analysis, the cells were transfected with the pGL3-Basic-8xgRNA-eBFP reporter plasmid. In short, cells were first washed with 500  $\mu$ l warm DPBS (Gibco) and then detached using 200  $\mu$ l Accutase (Gibco). The volume was filled up to 500  $\mu$ l using cultivation medium and the resuspended cells were transferred into FACS tubes (BD). The cells were centrifuged for 5 min at 200 g. Then the supernatant was removed and the cells were washed with 1 ml warm DPBS. The cells were measured using a BD FACS Canto II. The voltage for FSC was set to 50 V, SSC to 300 V and Pacific Blue Laser (405 nm) to 187 V. The FSC threshold was set to 5.000. HeLa cells were gated for single cells with an auto fluorescence of 1% (Figure S2e, Supporting Information). The activation was normalized using the feature scaling method. For *Metridia* luciferase reporter assays, 50.000 HeLa cells were seeded. As reporter plasmid pGL3-Basic-8xgRNA-metLuc was used. For

## SUPPORTING INFORMATION

measurement, 50  $\mu$ l of supernatant was collected from each sample and transferred to a LUMITRAC 200 96-well plate. Luciferase reagents were prepared according to the manufacturers manual (Clontech). For the reversible *Metridia* luciferase reporter assays, after transfection 50  $\mu$ l of supernatant was collected for measurement while the rest was replaced by fresh cell culture medium. The replacement of supernatant was done before every switching illumination setting from light to dark or dark to light.

**Optogenetic activation of endogenous ASCL1:** HeLa cells were seeded at 70.000 cells per well in 24-well plates and cultured for 24h at 37 °C and 5% CO<sub>2</sub>. HeLa cells were transfected using Lipofectamine 2000. For the experiments three plasmids were mixed in a specific ratio and a final amount of 200 fmol. The ratio used was 2:1:1 (dCas9:Effector:sgRNA). For MS2 dependent activation MPH was used. For PAL dependent activation the plasmid PHP was used. For all experiments the pdCas9-T2A-eGFP plasmid was used for dCas9 expression. For the expression of the sgRNAs, pENTR plasmids that contains a hU6 promoter were used. The transfection was incubated for 4 hours at 37°C and 5% CO<sub>2</sub> in the presence of blue light of 465 nm or in the absence of light. After the replacement of medium the cells were incubated for 24 hours in the light or in the dark. For qPCR analysis, cellular RNA isolation and reverse-transcription were done with the Cells-to-Ct kit (Thermo Fisher Scientific) using TaqMan gene expression master mix (Thermo Fisher Scientific). TaqMan probes were used for ASCL1 and GAPDH detection (Life Technologies; TaqMan gene expression assay IDs were Hs04187546\_g1 (ASCL1) and Hs99999905\_m1 (GAPDH)). The fold induction of mRNA was calculated by first calculating the  $\Delta$ c<sub>t</sub> value for each biological sample. The  $\Delta$ c<sub>t</sub> values were then normalized to control sgRNA to obtain  $\Delta\Delta$ c<sub>t</sub> values. For the fold induction of mRNA,  $2^{-\Delta\Delta c_t}$  was calculated.

**Cas9 cleavage assays:** First, a 1  $\mu$ M Cas9 solution was prepared from a 20  $\mu$ M Cas9 stock solution (NEB, Ipswich) in 1x Cas9 buffer (NEB, Ipswich). The DNA cleavage substrate was amplified from pGL3-Basic-8xgRNA-eBFP. Per assay 150 ng of substrate was used. In the assay molar ratios of 8:1 (Cas9:substrate) and 1:1 (Cas9:gRNA) were used in a final volume of 20  $\mu$ l. First ddH<sub>2</sub>O, Cas9 buffer and sgRNA were mixed in a single reaction tube. For sgRNA refolding, the mixture was heated for 2 min at 95 °C and then cooled down to 20 °C with 6 °C/min. For complex formation Cas9 was added and incubated for 5 min at 20 °C. The substrate was added to start the reaction. The cleavage reaction was incubated for 35 min at 37 °C. Subsequently 1  $\mu$ l of 20 mg/ml Proteinase K (Roth) was added and incubated for 35 min at 55 °C to stop the reaction. The reaction was loaded on a 1% agarose gel. The samples were run for 30 min at 130 V and then stained with ethidium bromide. The cleavage products were visualized using UV irradiation and images were made. The cleavage fractions were analyzed using ImageJ 1.50i software.

**In vitro transcription of gRNAs:** sgRNA templates with a 5' attached T7 promoter were ordered from Ella Biotech (Martinsried, Germany). The in vitro transcription was done overnight and the RNA was isolated and purified by PAGE and electro elution.

**Statistics:** Statistical analysis for pairwise comparisons between light/dark experiments was performed using Welch's two-tailed *t*-test and confidence intervals of 95% in Prism 6.



SUPPORTING INFORMATION

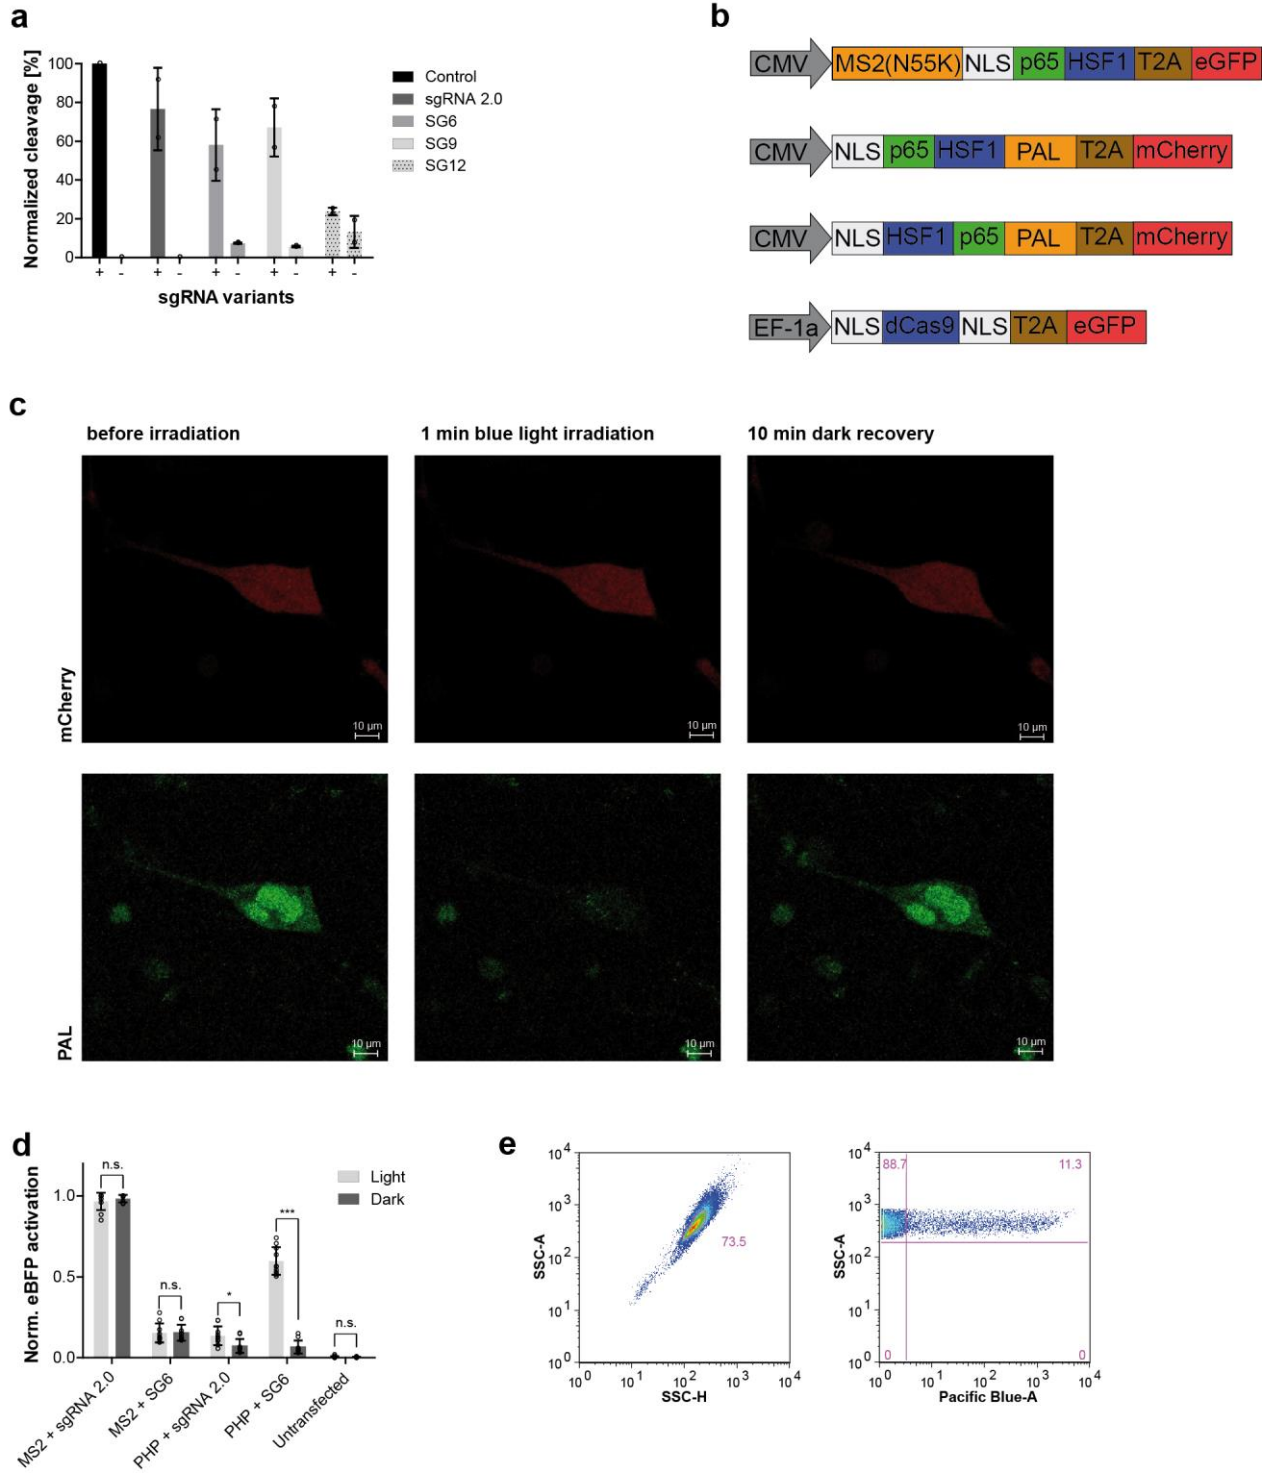

## SUPPORTING INFORMATION

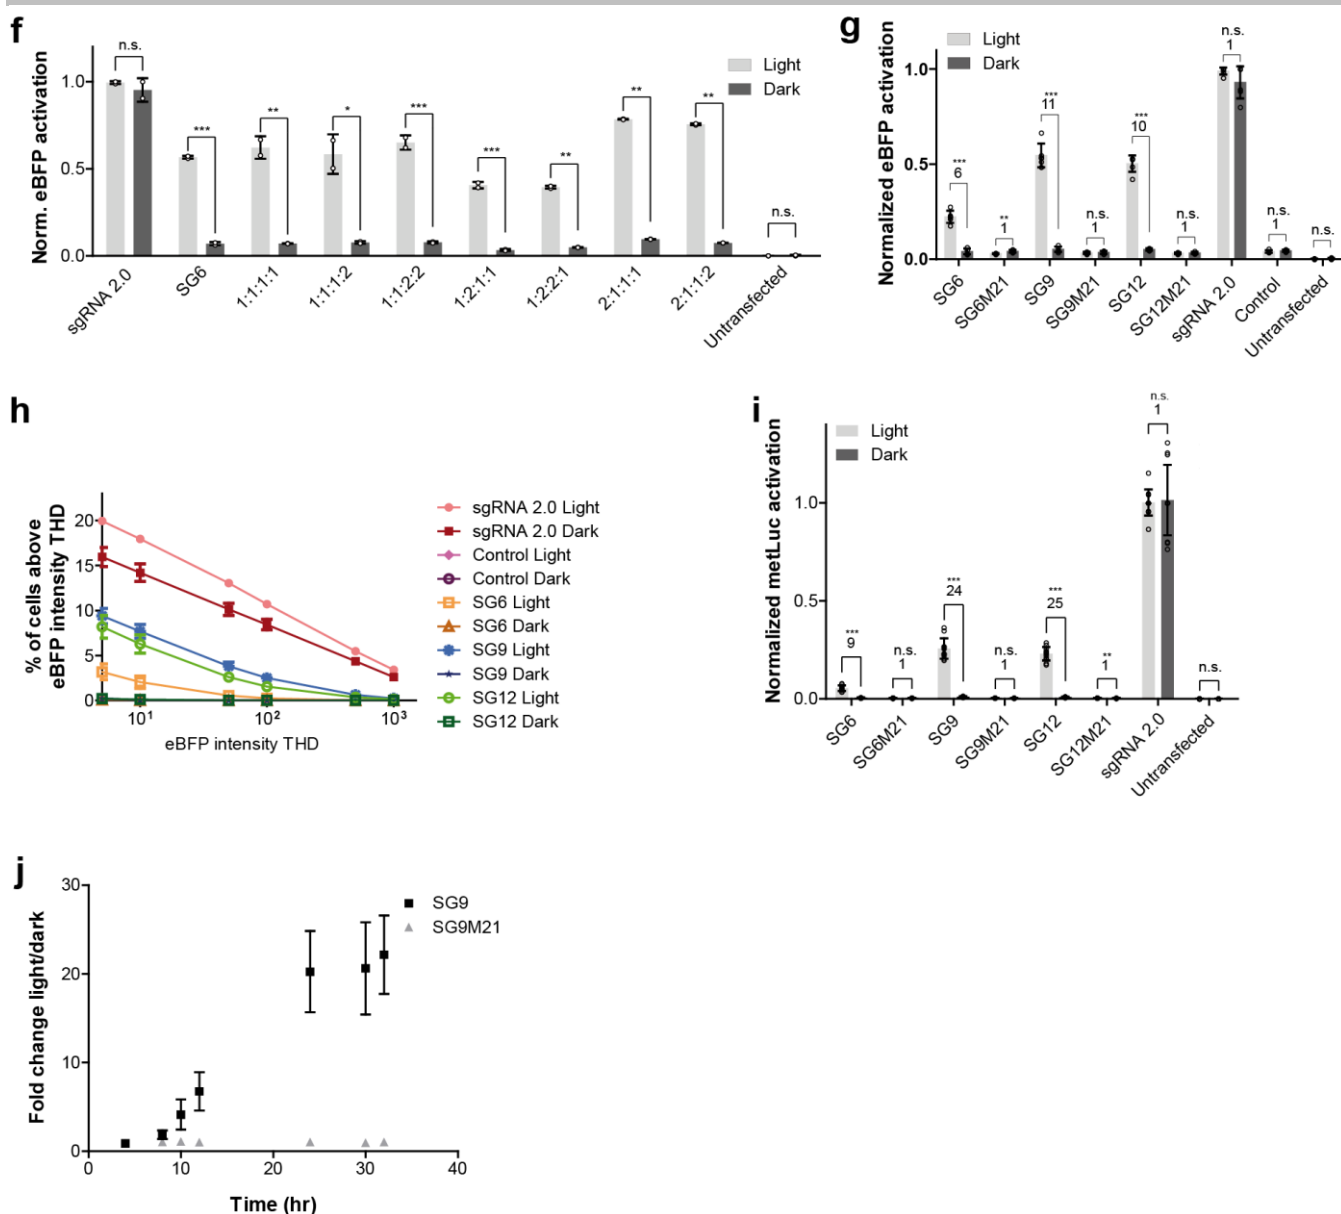

**Figure S2.** (a) Cas9 cleavage assay. The PAL-aptamer modified sgRNAs were tested in a Cas9 cleavage assay. New sgRNAs were designed incorporating the PAL-aptamer with varying stem sizes (SG6, SG9 and SG12) in the TL and SL2 accordingly to the design of sgRNA 2.0. The data is presented as mean values  $\pm$  s.d and was normalized to the control sgRNA using min-max scaling ( $n = 2$  from 2 individual experiments). (b) Expression cassettes of the activating fusion proteins and the dCas9 plasmid. (c) Switching activity of the photoreceptor fusion protein PHP. HeLa cells were transfected with PHP and analyzed regarding PAL localization in the nucleus and ubiquitous mCherry expression. The cells were irradiated with blue light to change the conformation of PAL, which leads to a loss of PAL fluorescence. After 10 min recovery in the dark, PAL switches back to the fluorescent dark conformation indicating that the fusion protein can undergo a complete photo cycle. Scale bar = 10  $\mu$ m. (d) Light-induced activation of eBFP expression. HeLa cells were transfected with dCas9, MPH or PHP, eBFP reporter and sgRNA targeting the 8x sgRNA binding sites upstream of the eBFP promoter. The data is presented as mean values  $\pm$  s.d and was normalized to sgRNA 2.0 control using min-max scaling ( $n = 10$  from 5 individual experiments with two cell culture replicates). Welch's two-tailed  $t$ -test was performed for the fold induction in the light versus the sample in the dark. The resulting  $p$ -values of the samples are given in the Supporting Information in Table S3. \* $p < 0.05$ , \*\* $p < 0.01$ , \*\*\* $p < 0.005$  versus the sample in the dark. (e) Gating strategy for optogenetic eBFP activation assays. HeLa cells were analyzed by flow cytometry and 30,000 events were recorded. From all events, first the main single-cell population was isolated using SSC-A to SSC-H plot. The isolated population was then plotted to visualize the signal intensity of the Pacific Blue-A channel. A quadrant gate was applied, which separates the population from cells with more (Q2) and less (Q1) than 1% fluorescence. Events that have a Pacific Blue-A intensity, which exceeds 1% (Q2 gate) are considered as activated cells. Q2 gate values were exported as table and the values were further processed in Microsoft Excel for normalization. (f) Optimization of plasmid ratios for light-induced activation of eBFP expression. HeLa cells were transfected with different ratios of dCas9, MPH or PHP, eBFP reporter and sgRNA targeting the 8x sgRNA binding sites upstream of the eBFP promoter. The data is presented as mean values  $\pm$  s.d and was normalized to the sgRNA 2.0 control using min-max scaling ( $n = 6$  from 3 individual experiments with two cell culture replicates). Welch's two-tailed  $t$ -test was performed for the fold induction in the light versus the sample in the dark. The resulting  $p$ -values of the samples are given in the Supporting Information in Table S3. \* $p < 0.05$ , \*\* $p < 0.01$ , \*\*\* $p < 0.005$  versus the sample in the dark. (g) Light-dependent upregulation of eBFP using sgRNAs with mutants and varying aptamer stem-lengths showing normalized data. The data is presented as mean values  $\pm$  s.d and was normalized to the sgRNA 2.0 control

## SUPPORTING INFORMATION

using min-max scaling (n = 6 from 3 individual experiments with two cell culture replicates). Welch's two-tailed *t*-test was performed for the fold induction in the light versus the sample in the dark. The resulting *p*-values of the samples are given in the Supporting Information in Table S3. \**p* <0.05, \*\**p* <0.01, \*\*\**p* <0.005 versus the sample in the dark. (h) Light-dependent upregulation of eBFP using sgRNAs with mutants and varying aptamer stem-lengths. The number of eBFP positive cells gained from (g) is presented as a function of eBFP intensity threshold (THD). The data is presented as mean values ± s.d (n = 6 from 3 individual experiments with two cell culture replicates). (i) Light-dependent upregulation of *Metridia* Luciferase using sgRNAs with varying aptamer stem-lengths and point mutants showing normalized data. The data is presented as mean values ± s.d and was normalized to the sgRNA 2.0 control using min-max scaling (n = 6 from 3 individual experiments with two cell culture replicates). Welch's two-tailed *t*-test was performed for the fold induction in the light versus the sample in the dark. The resulting *p*-values of the samples are given in the Supporting Information in Table S3. \**p* <0.05, \*\**p* <0.01, \*\*\**p* <0.005 versus the sample in the dark. (j) Light-dependent activation of *Metridia* luciferase expression over time. The data is presented as mean values ± s.d (n = 6 from 3 individual experiments with two cell culture replicates). Welch's two-tailed *t*-test was performed for the fold induction in the light versus the sample in the dark. The resulting *p*-values of the samples are given in the Supporting Information in Table S3. \**p* <0.05, \*\**p* <0.01, \*\*\**p* <0.005 versus the sample in the dark.

**Table S1.** Target sequences of sgRNAs.

| sgRNA name | Target                                          | Seed sequence 5'→3'   |
|------------|-------------------------------------------------|-----------------------|
| CMV        | 8x gRNA repeat upstream of minimal CMV promoter | aaaggtcgagaaactgcaaa  |
| Nonsense   | No target in human genome                       | gaacagtcgctttcgact    |
| sgASCL1-1  | ASCL1                                           | ggctgggtgtccattgaaa   |
| sgASCL1-2  | ASCL1                                           | gcagccgctcgctgcagcag  |
| sgASCL1-3  | ASCL1                                           | gtgtttattcagccgggagtc |
| sgASCL1-4  | ASCL1                                           | gatggagagtttcaaggagc  |
| sgASCL1-5  | ASCL1                                           | gcaggagggacaaatggctct |
| sgASCL1-6  | ASCL1                                           | gagtgaggagagagaaaaac  |

**Table S2.** Oligonucleotide sequences for constructing sgRNAs

See attached excel file.

**Table S3.** Statistical analysis

| Figure | Dataset 1             | Dataset 2              | <i>p</i> -value | Significance |
|--------|-----------------------|------------------------|-----------------|--------------|
| 2d     | HPP + SG9, Dark       | HPP + SG9, Light       | 0.0004          | ***          |
|        | HPP + SG9M21, Dark    | HPP + SG9M21, Light    | 0.1891          | n.s.         |
|        | PHP + SG9, Dark       | PHP + SG9, Light       | 0.000004        | ***          |
|        | PHP + SG9M21, Dark    | PHP + SG9M21, Light    | 0.1128          | n.s.         |
| 2e     | SG9, Dark             | SG9, Light             | 0.0000002       | ***          |
|        | SG9M21 TL+SL2, Dark   | SG9M21 TL+SL2, Light   | 0.0147          | *            |
|        | SG9M21 TL, Dark       | SG9M21 TL, Light       | 0.0015          | **           |
|        | SG9M21 SL2, Dark      | SG9M21 SL2, Light      | 0.0073          | **           |
| 2g     | SG9 12h, Dark         | SG9 12h, Light         | 0.0000003       | ***          |
|        | SG9M21 12h, Dark      | SG9M21 12h, Light      | 0.9621          | n.s.         |
|        | SG9 24h, Dark         | SG9 24h, Light         | 0.000000005     | ***          |
|        | SG9M21 24h, Dark      | SG9M21 24h, Light      | 0.0092          | **           |
|        | SG9 36h, Dark         | SG9 36h, Light         | 0.000003        | ***          |
|        | SG9M21 36h, Dark      | SG9M21 36h, Light      | 0.1371          | n.s.         |
| 3c     | sgRNA 2.0, Dark       | sgRNA 2.0, Light       | 0.1191          | n.s.         |
|        | SG9#2, Dark           | SG9#2, Light           | 0.0003          | ***          |
|        | SG9#4, Dark           | SG9#4, Light           | 0.000007        | ***          |
|        | SG9#2 + SG9#4, Dark   | SG9#2 + SG9#4, Light   | 0.000001        | ***          |
| S2d    | MS2 + sgRNA 2.0, Dark | MS2 + sgRNA 2.0, Light | 0.3923          | n.s.         |
|        | MS2 + SG6, Dark       | MS2 + SG6, Light       | 0.9491          | n.s.         |
|        | PHP + sgRNA 2.0, Dark | PHP + sgRNA 2.0, Light | 0.0133          | *            |
|        | PHP + SG6, Dark       | PHP + SG6, Light       | 0.000000006     | ***          |
| S2f    | sgRNA 2.0, Dark       | sgRNA 2.0, Light       | 0.8485          | n.s.         |
|        | SG6, Dark             | SG6, Light             | 0.0005          | ***          |
|        | 1:1:1:1, Dark         | 1:1:1:1, Light         | 0.0088          | **           |
|        | 1:1:1:2, Dark         | 1:1:1:2, Light         | 0.0175          | *            |







## SUPPORTING INFORMATION

CTGCAG GGCCTAGCAAGTTAAAATAAGGCTAGTCCGTTATCAACTT GGCCA  
GCGCGGCCGG GTACAGCAGCGATGC CCGCCGCGC  
CTGCAGGGCCAAGTGGCACCGAGTCGGTGCTTTT

## SG9M21

NNNNNNNNNNNNNNNNNNNNGTTTTAGAGCTAGGCCA  
GGCCGCCGC GTACAGCTGCGATGC GCGGCGGCC  
CTGCAG GGCCTAGCAAGTTAAAATAAGGCTAGTCCGTTATCAACTT GGCCA  
GCGCGGCCGG GTACAGCTGCGATGC CCGCCGCGC  
CTGCAGGGCCAAGTGGCACCGAGTCGGTGCTTTT

## SG9M21TL

NNNNNNNNNNNNNNNNNNNNGTTTTAGAGCTAGGCCA  
GGCCGCCGC GTACAGCTGCGATGC GCGGCGGCC  
CTGCAG GGCCTAGCAAGTTAAAATAAGGCTAGTCCGTTATCAACTT GGCCA  
GCGCGGCCGG GTACAGCAGCGATGC CCGCCGCGC  
CTGCAGGGCCAAGTGGCACCGAGTCGGTGCTTTT

## SG9M21SL2

NNNNNNNNNNNNNNNNNNNNGTTTTAGAGCTAGGCCA  
GGCCGCCGC GTACAGCAGCGATGC GCGGCGGCC  
CTGCAG GGCCTAGCAAGTTAAAATAAGGCTAGTCCGTTATCAACTT GGCCA  
GCGCGGCCGG GTACAGCTGCGATGC CCGCCGCGC  
CTGCAGGGCCAAGTGGCACCGAGTCGGTGCTTTT

## SG12

NNNNNNNNNNNNNNNNNNNNGTTTTAGAGCTAGGCCA  
GGCCGCCGCCGC GTACAGCAGCGATGC GCGGCGGCCGCC  
CTGCAG GGCCTAGCAAGTTAAAATAAGGCTAGTCCGTTATCAACTT GGCCA  
GCGCGGCCGCCGG GTACAGCAGCGATGC CCGCCGCCGCC  
CTGCAGGGCCAAGTGGCACCGAGTCGGTGCTTTT

## SG12M21

NNNNNNNNNNNNNNNNNNNNGTTTTAGAGCTAGGCCA  
GGCCGCCGCCGC GTACAGCTGCGATGC GCGGCGGCCGCC  
CTGCAG GGCCTAGCAAGTTAAAATAAGGCTAGTCCGTTATCAACTT GGCCA  
GCGCGGCCGCCGG GTACAGCTGCGATGC CCGCCGCCGCC  
CTGCAGGGCCAAGTGGCACCGAGTCGGTGCTTTT

## SUPPORTING INFORMATION

## Note S2. Amino acid sequences of fusion proteins

**MS2(N55K)-p65-HSF1-T2A-eGFP**

MASNFTQFVLVDNNGGTGDVTVAPSNFANGVAEWISSNSRSQAYKVTCSVRQSSAQKRKYTIKVEVPKVATQTVGGVELPVAAWRSYLNMELTI  
 PIFATNSDCELVKAMQGLLKDGNPIPSAIAANSNGIYSAGGGGSGGGGSGGGGSGPKKKRVAAGSPSGQISNQALALAPSSAPVLAQTMVP  
 SSAMVPLAQPPAPAPVLTGPPQSLAPVPKSTQAGEGTLSEALLHLQFDAQEDLGLLGNSTDPGVFTDLASVDNSEFQQLLNQGVSMHST  
 AEPMLMEYPEAITRLVTSQRPPDPAPTPLGTSGLPNGLSGDEDFSSIADMDFSALLSQISSGQGGGSGFVSVDTSALLDLFSPSVTPDMSL  
 PDLDSLASIQELLSQPPEPRPEAENSSPDSGKQLVHYTAQPLFLLDPGSVDTGSNDLPVLFELGEGSYFSEGDFGAEDPTISLLTGSEPPKAK  
 DPTVSAAGSGEGRGSLTTCGDVEENPGPVSKGEELFTGVVPIVELDGDVNGHKFVSVEGEGDATYGLTLKFICTTGKLPVPWPPTLVTTLY  
 GVQCFSRYPDHMKQHDFFKSAMPEGYVQERTIFFKDDGNYKTRAEVKFEGDTLVNIELKGDIFKEDGNILGHKLEYNYNSHNVIYIMADKQKN  
 GIKVNFKIRHNIEDGSVQLADHYQQNTPIGDGPVLLPDNHYLSTQSALS KDPNEKRDMVLLFEVTAAGITLGMDELYK-

**NLS-p65-HSF1-PAL-T2A-mCherry**

MPKKKRKVAAGSPSGQISNQALALAPSSAPVLAQTMVPSSAMVPLAQPPAPAPVLTGPPQSLAPVPKSTQAGEGTLSEALLHLQFDAQEDL  
 LGALLGNSTDPGVFTDLASVDNSEFQQLLNQGVSMHSTAEPMLMEYPEAITRLVTSQRPPDPAPTPLGTSGLPNGLSGDEDFSSIADMDFS  
 ALLSQISSGQGGGSGGCTTCAGCGTGGACACCAGTGCCTGTCTGGACCTGTTTTCAGCCCCTCGGTGACCGTGCCCGACATGAGCCTGC  
 CTGACCTTGACAGCAGCCTGGCCAGTATCCAAGAGCTCTGCTCCCCAGGAGCCCCCAGGCCTCCCGAGGCAGAGAACAGCAGCCCC  
 GGATTCAGGGAAGCAGCTGGTGCCTACACAGCGCAGCCGCTGTTCTGCTGGACCCCGCTCGTGGACACCGGGAGCAACGACCT  
 GCCGGTGTCTTTGAGCTGGGAGAGGGCTCCTACTTCTCCGAAGGGGACGGCTTCGCCGAGGACCCACCATCTCCCTGCTGACAGGC  
 TCGGAGCCTCCCAAAGCAAGGACCCCACTGTCTCCGGSGGGGSGGKVNRPAAERASFGSFVLDAGSARFVGSDELALVLGFAPGDVVL  
 TPAVLAHLHPDDRLEWQAGLQRCLATGRPVVNHLLLTAEAEPRPAMTTLTALTEQDRVAVTGVTDLSDRVRRATEAIRQAVRAAAATRS  
 EIDQAKGIVMAAFDADQAFALLKWHSSQSNRKLRLDLAGMIEGLAAANSALPLRRRLSTVFTDMGCPAPSTKGWTVPVTDIGLPPTSLIPT  
 ALLPGILTRAHDASVAITVADVTAPDQPLVYANPAFERLTGYAAA EVLGRNCRFLQAESGDPHERSAIRSAIANGDAVTTLIRNFRQDGHAFWN  
 EFHLSVVRNGAGRVTYIGYQLDVTVERVDQQLQLEQASEGRGSLTTCGDVEENPGPMVSKGEEDNMAIIKEFMRFKVMHEGVSNGHEFEIE  
 GEGEGRPYEGTQAKLKVTKGGPLPFAWDILSPQFMYGSKAYVKHPADIPDYKLSFPEGFKWERVMNFEDGGVVTVDSSLDQGEFIYKVK  
 LRGTNFPDGPVMQKKTMGWEASSERMYPEDGALKGEIKRQLKLDGGHYDAEVKTTYKAKKPVQLPGAYNVNLIKLDITSHNEDYIVEYER  
 AGRHSTGGMDELYK-

**NLS-HSF1-p65-PAL-T2A-mCherry**

MPKKKRKVSQGGGSGFVSVDTSALLDLFSPSVTPDMSLPDLDSLASIQELLSQPPEPRPEAENSSPDSGKQLVHYTAQPLFLLDPGSV  
 TGSNDLPVLFELGEGSYFSEGDFGAEDPTISLLTGSEPPKAKDPTVSAAGSPSGQISNQALALAPSSAPVLAQTMVPSSAMVPLAQPPAPAPV  
 LTPGPPQSLAPVPKSTQAGEGTLSEALLHLQFDAQEDLGLLGNSTDPGVFTDLASVDNSEFQQLLNQGVSMHSTAEPMLMEYPEAITRLV  
 TGSQRPPDPAPTPLGTSGLPNGLSGDEDFSSIADMDFSALLSQISSGSGGGGSGGGGSGKVNRPAAERASFGSFVLDAGSARFVGSDELALVLG  
 FAPGDVVLTPAVLAHLHPDDRLEWQAGLQRCLATGRPVVNHLLLTAEAEPRPAMTTLTALTEQDRVAVTGVTDLSDRVRRATEAIRQAV  
 RAAAATRSEIDQAKGIVMAAFDADQAFALLKWHSSQSNRKLRLDLAGMIEGLAAANSALPLRRRLSTVFTDMGCPAPSTKGWTVPVTDIGLP  
 PTSLIPTALLPGILTRAHDASVAITVADVTAPDQPLVYANPAFERLTGYAAA EVLGRNCRFLQAESGDPHERSAIRSAIANGDAVTTLIRNFRQ  
 DGHAFWNEFHLSVVRNGAGRVTYIGYQLDVTVERVDQQLQLEQASEGRGSLTTCGDVEENPGPMVSKGEEDNMAIIKEFMRFKVMHEGVS  
 NGHEFEIEGEGEGRPYEGTQAKLKVTKGGPLPFAWDILSPQFMYGSKAYVKHPADIPDYKLSFPEGFKWERVMNFEDGGVVTVDSSLDQ  
 GEFIYKVKLRGTNFPDGPVMQKKTMGWEASSERMYPEDGALKGEIKRQLKLDGGHYDAEVKTTYKAKKPVQLPGAYNVNLIKLDITSHNED  
 YIVEYERAEGRHSTGGMDELYK-

**NLS-dCas9(D10A, H840A)-NLS-T2A-eGFP**

MSPKKKRKVEASDKKYSIGLAIGTNSVGWAVITDEYKVPKFKVGLNTRHSIKKNLIGALLFDSGETAEATRLKRTARRRYTRRKNRICYLQEI  
 FSNEMAKVDDSFHRLLESFLVEEDKKHERHPIFGNIVDEVAYHEKYPTIYHLRKKLVDSTDKADLRLIYLALAHMIKFRGHFLIEGLNPDNSDV  
 DKLFIQLVQTYNQLFEENPINASGVDAKAILSARLSKSRRENLIQLPGEKKNGLFGNLIASLGLTPNFKSNFDLAEDAQLKLSKDYDDDLNLDL  
 LAQIGDQYADLFLAAKNLSDAILSDILRVNTEITKAPLSASMIKRYDEHHQDLTLLKALVRQQLPEKYKEIFFDQSKNGYAGYIDGGASQEEFYK  
 IKPILEKMDGTEELLVKNREDLLRKQRTFDNGSIPHQIHLGELHAILRRQEDFYFPLKDNREKIEKILTRIPYVYVGLARGNSRFVWMTKSEETI  
 TPWNFEVVDKGASAQSFIERMTNFDKLNPNKVLPHKSLLEYFTVYNELTKVKYVTEGMRKPAFLSGEQKKAIVDILLFKTNKRVTKQLKED  
 YFKKIECFDSVEISGVEDRFNASLGTYHDLKIIKDKDFLDNEENEDILEDIVLTLTFEDREMIEERLKYAHLFDDKVMKQLKRRRYTGWGRLSR  
 KLINGIRDQSGKTILDFLKSDFANRNFMLIHDDSLTFKEDIQKAQVSGQDLSHEHIANLAGSPAIIKGLQTVKVVDELVKVMGRHKPENIVI  
 EMARENQTTQKQKNSRERMKRIEIGIKELGSQILKEHPVENTQLQNEKLYLYLQNGRDMYVDQELDINRLSDYDVAIVPQSFLKDDSIDNK  
 VLTRSDKNRGSNDVNPSEEVVKKMKNYWRQLLNAKLITQRKFDNLTKAERGGSELKAGFIKRLVETRQITKHVAQILDSRMNTKYDENDKL  
 IREVKVITLKSFLVDFRDFQFYKVFREINNYHHAHDAYLNAVVGTAIIKYPKLESEFVYGYDYVDRKMIKSEIQAEGKATAKYFFYSNIMNFF  
 KTEITLANGEIRKRLIETNGETGEIVWDKGRDFATVRKVLSPQVNVKTEVQTTGGFSKESILPKRNSDKLIARKKDWDPKPYGGFDSPTVAY  
 SVLVVAKVEKGSKKLSVKELLGITIMERSSEFKNPIDFLEAKGYEVKDLIIKLPKYSLELENGRKRMLASAGELQKGNELALPSKYVNFYLL  
 ASHYEKLKGSPEDEKQQLFVEQHKHYLDEIIQISEFSKRVLADANLKVLSAYNKHDKPIREQAENIIHLFTLNLGAPAAFKYFDTTIDRKR  
 YTSTKEVLDTLIHQSTGLYETRIDLSQLGGDSAGGGGSGGGGSGGGGSGPKKKRVAAINASGSGEGRGSLTTCGDVEENPGPVSKGEELF  
 TGVVPIVELDGDVNGHKFVSVEGEGDATYGLTLKFICTTGKLPVPWPPTLVTTLYGVQCFSRYPDHMKQHDFFKSAMPEGYVQERTIFFK  
 DGNKTRAEVKFEGDTLVNIELKGDIFKEDGNILGHKLEYNYNSHNVIYIMADKQKNGIKVNFKIRHNIEDGSVQLADHYQQNTPIGDGPVLLPD  
 NHYLSTQSALS KDPNEKRDMVLLFEVTAAGITLGMDELYK-
